# Supplementary material
Source: ML conference proceedings conference paper supplement (https://openaccess.thecvf.com/content/CVPR2024/html/Yang_OmniMotionGPT_Animal_Motion_CVPR_2024_paper.html)
Supplement: Supplementary file 2 [file Yang_OmniMotionGPT_Animal_Motion_CVPR_2024_supplemental.zip]

Archive with 8 entries (8 files):
- 4211_supp/4211_supp.pdf
- 4211_supp/fig1_fig2.mp4
- 4211_supp/fig4_bottom_left.mp4
- 4211_supp/fig4_bottom_right.mp4
- 4211_supp/fig4_top_left.mp4
- 4211_supp/fig4_top_right.mp4
- 4211_supp/fig5.mp4
- 4211_supp/fig9.mp4
